# Supplementary material for: Hybrid MIL-101(Cr)@MIL-53(Al) composite for carbon dioxide capture from biogas
Source: Royal Society of Chemistry journal article supplement (doi:10.1039/c8ra10619c), 2019-01-01
Supplement: c8ra10619c1.pdf [file c8ra10619c1.pdf]

## Supplementary Information

# Hybrid Metal-Organic Framework for Carbon Dioxide Capture from Biogas

Armin Taheri <sup>a\*</sup>, Ensieh Ganji Babakhani <sup>b</sup>, Jafar Towfighi Darian <sup>b</sup>, Saeed Pakseresht <sup>c</sup>

<sup>a</sup> *Young Researchers and Elites club, Science and Research Branch, Islamic Azad University, Tehran, Iran*

<sup>b</sup> *Gas Department, Research Institute of Petroleum Industry (RIPI), Tehran, Iran*

<sup>c</sup> *Research & Technology Directorate of National Iranian Gas Company, Iran*

\* Corresponding author: E-mail addresses: [armin.taheri@gmail.com](mailto:armin.taheri@gmail.com), [armin\\_taheri@alum.sharif.edu](mailto:armin_taheri@alum.sharif.edu)

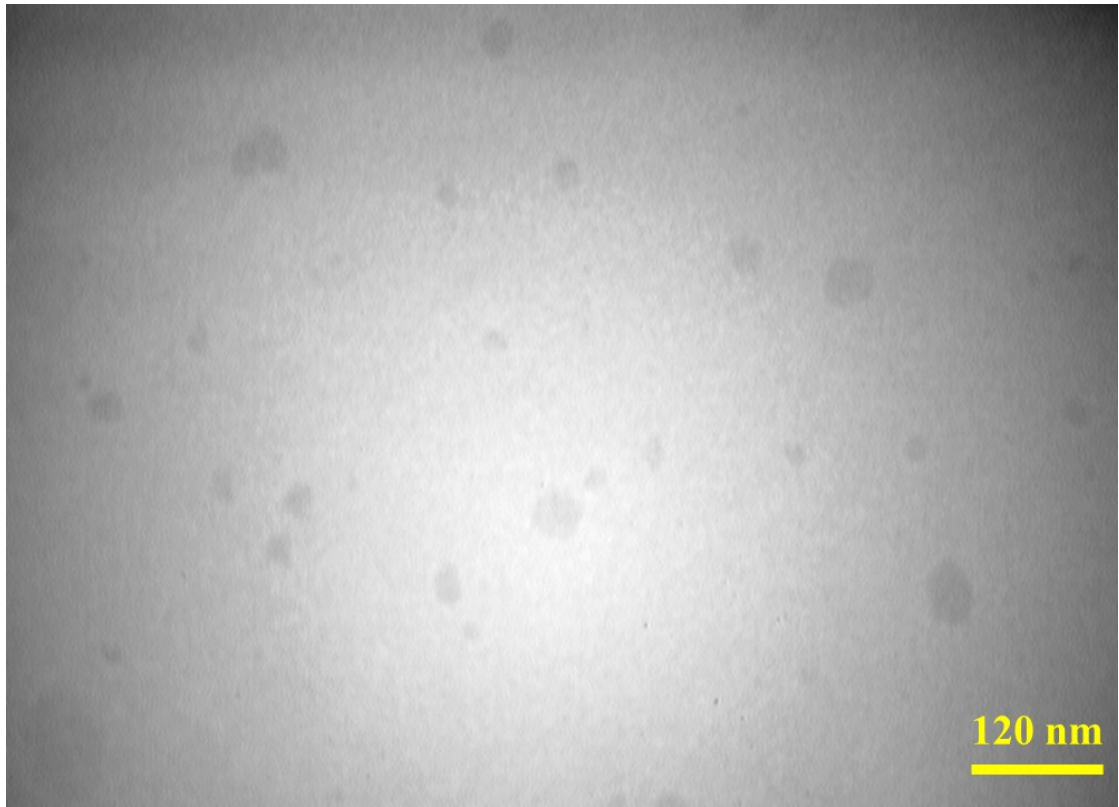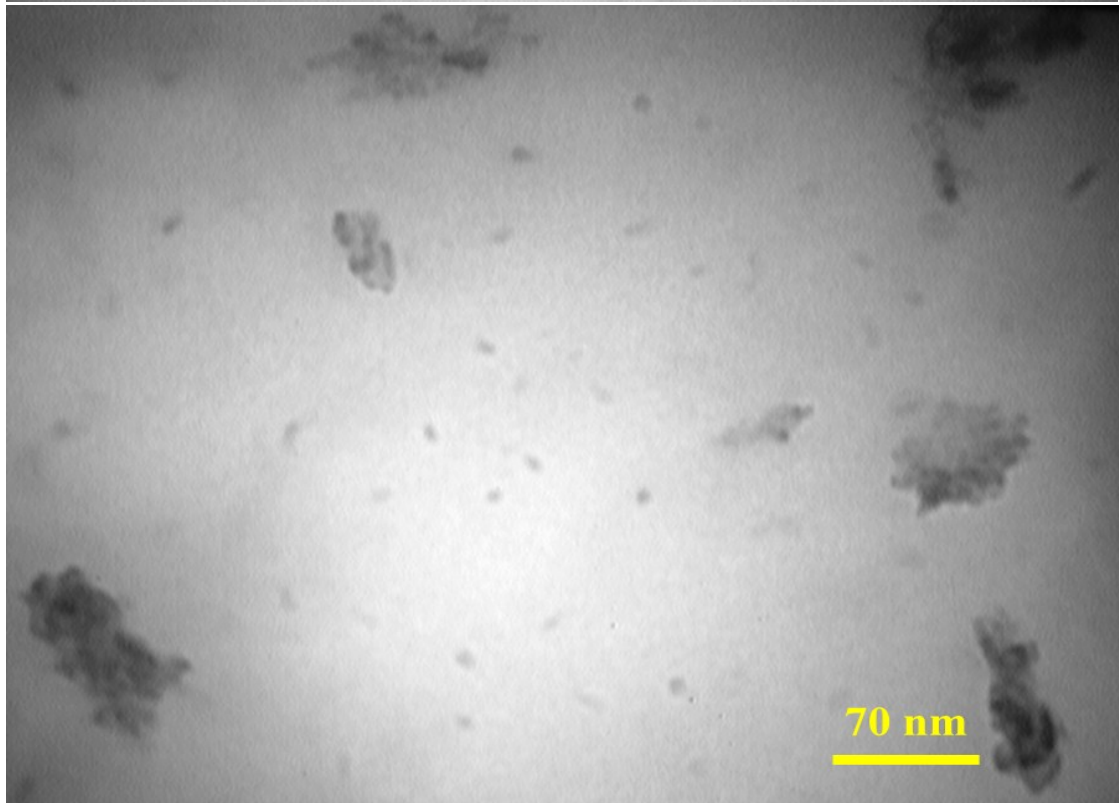

**Figure S1- TEM image of s1 (up) and s2 (down)**
